# Supplementary material for: Cortical neuroprosthesis-mediated functional ipsilateral control of locomotion in rats with spinal cord hemisection
Source: eLife. 2024 Nov 25;12:RP92940. doi: 10.7554/eLife.92940 (PMC11588340; doi:10.7554/eLife.92940)
Supplement: Figure 1—source data 1. [file elife-92940-fig1-data1.xlsx]

## Sheet: Fig.1
Panel 1B
Gait modulation depends on stimulation delivery timing
	Step height (cm) - Right hindlimb [SP:spontaneous, t# stimulation timing]
Rat no.	SP	t1	t2	t3	t4 (LC)	t5	t6	t7	t8	t9 (RC)	t10
1	0.965556	1.59083	1.8875	1.865	2.33667	2.46	2.375	2.87417	2.66667	2.24167	1.75167
2	0.913704	1.16136	1.42296	1.64083	1.87222	2.15569	2.21926	1.91741	2.35508	1.42689	1.23469
3	0.953951	1.91765	1.70222	1.7079	2.25667	2.25125	2.35716	1.82605	2.35244	2.28753	1.81476
4	1.90889	2.48074	1.76778	1.97926	2.54741	2.56014	2.75926	3.57639	3.14159	2.84222	2.09792
5	0.942963	1.27741	1.38679	1.02667	1.71583	1.96914	2.83654	2.20317	1.97143	1.82667	1.3121
6	0.984333	1.16242	1.39222	1.28815	1.90346	2.12037	1.78975	2.92028	2.70603	2.14133	1.57642
	Swing asymmetry (aU) - Left versus right hindlimb [SP:spontaneous, t# stimulation timing]
Rat no.	SP	t1	t2	t3	t4 (LC)	t5	t6	t7	t8	t9 (RC)	t10
1	-0.148147	-0.0942009	-0.262735	-0.341709	-0.366857	-0.215931	-0.228516	-0.176228	-0.0709073	-0.00962748	-0.0023133
2	0.0178446	-0.400411	-0.351717	-0.347987	-0.336713	-0.313462	-0.310284	-0.213595	-0.199431	-0.0939083	-0.250854
3	0.0649434	-0.172414	-0.2	-0.19346	-0.291055	-0.230233	-0.206862	-0.269029	-0.163449	-0.0378517	-0.0433517
4	-0.132809	-0.18115	-0.169908	-0.187214	-0.189686	-0.107748	-0.184889	-0.102784	-0.134199	-0.167046	-0.145455
5	-0.0216623	-0.18289	-0.143116	-0.212454	-0.163298	-0.228713	-0.312253	-0.209863	-0.188872	-0.121482	-0.162791
6	-0.0570559	0.000651678	-0.144561	-0.266709	-0.143294	-0.179293	-0.193529	-0.0330422	-0.0983062	-0.0680081	-0.100342
	Stance asymmetry (aU) - Left versus right hindlimb [SP:spontaneous, t# stimulation timing]
Rat no.	SP	t1	t2	t3	t4 (LC)	t5	t6	t7	t8	t9 (RC)	t10
1	0.0534672	-0.00546528	0.101843	0.158359	0.17624	0.0872429	0.0720172	0.0629595	0.0323749	0.0168581	-0.0228587
2	0.0181523	0.180987	0.157687	0.135845	0.128698	0.145936	0.115194	0.0889173	0.0197882	0.0380459	0.0471474
3	-0.0193507	0.025	0.0606061	0.0637397	0.132764	0.0879026	0.0717027	0.101157	0.00625707	0.0025207	0.00300402
4	0.0405873	0.0682974	0.0749742	0.0702028	0.08023	0.0408529	0.0709087	0.0415909	-0.0100103	-0.0248945	0.0786517
5	0.000784545	0.0620977	0.093105	0.160969	0.0924552	0.0815629	0.229167	0.140175	0.146592	-0.0390133	-0.0120482
6	0.0208867	0.0175439	0.0694565	0.147015	0.0529291	0.0907058	0.065472	0.0238999	0.0170682	0.0359126	0.0661225
Panel 1D							Panel 1E
Stimulation does not modulate left kinematics							Stimulation modulates right kinematics
	Step height (cm)							Step height (cm)
Rat no.	0	0.25	0.5	0.75	1		Rat no.	0	0.25	0.5	0.75	1
1	0.849667	0.690778	0.941	1.05367	1.00467		1	0.965556	1.11476	2.6158	2.92284	3.01037
2	0.869667	0.805	0.948556	0.932	0.911556		2	0.913704	1.55794	1.66111	1.54689	2.0675
3	1.20944	0.981333	0.949841	1.25619	1.06922		3	1.27852	2.44802	2.56556	2.5984	3.22457
4	0.949667	0.778333	1.03933	0.888	0.96875		4	0.953951	2.1037	2.28025	2.16704	2.33309
5	1.20578	1.03467	1.10811	1.33233	0.837778		5	1.45333	2.81093	2.46815	2.8516	3.33988
6	1.32233	1.43644	1.16878	1.49593	0.678889		6	0.942963	1.37111	1.72802	2.43852	2.64111
	Flexion velocity (cm/s)							Flexion velocity (cm/s)
Rat no.	0	0.25	0.5	0.75	1		Rat no.	0	0.25	0.5	0.75	1
1	13.725	11.8429	16.4051	17.885	15.7311		1	17.3193	27.391	45.0541	47.169	52.498
2	13.789	18.1262	16.1185	16.229	16.346		2	24.4926	35.6361	37.9485	37.0216	49.717
3	14.7097	8.10731	12.0499	24.5571	15.021		3	28.8939	46.4194	46.3863	50.1988	59.0984
4	20.3452	18.8019	23.5855	22.8358	22.9862		4	21.0972	34.2019	34.5234	42.8678	33.6961
5	26.5548	24.2059	25.8067	25.3588	27.0018		5	32.587	46.2188	40.6517	50.982	57.6215
6	26.6182	30.1783	27.2741	30.8568	13.6086		6	24.7916	39.3097	45.9169	50.3228	48.553
Panel 1F
Stimulation modulates phases durations
	Swing asymmetry (aU) - Left versus right hindlimb							Stance asymmetry (aU) - Left versus right hindlimb
Rat no.	0	0.25	0.5	0.75	1		Rat no.	0	0.25	0.5	0.75	1
1	-0.00540886	-0.0419985	-0.260818	-0.343933	-0.371591		1	0.00765072	0.0137239	0.137105	0.175995	0.203302
2	0.0649434	-0.183252	-0.226445	-0.288091	-0.283857		2	-0.0193507	0.0809747	0.0966015	0.125903	0.117845
3	-0.0384484	-0.259369	-0.273015	-0.306473	-0.338231		3	0.0163797	0.129718	0.115842	0.139231	0.165709
4	-0.0635268	-0.135439	-0.213452	-0.205223	-0.343507		4	0.0261535	0.0543424	0.0987503	0.111585	0.179339
5	-0.0916414	-0.0543514	-0.133202	-0.153848	-0.203736		5	0.0476237	0.0285055	0.0619967	0.0647799	0.0859931
6	-0.0550886	-0.192216	-0.265661	-0.289665	-0.250357		6	0.0256225	0.0812863	0.114485	0.146872	0.0760954
