# Supplementary material for: Cortical neuroprosthesis-mediated functional ipsilateral control of locomotion in rats with spinal cord hemisection
Source: eLife. 2024 Nov 25;12:RP92940. doi: 10.7554/eLife.92940 (PMC11588340; doi:10.7554/eLife.92940)
Supplement: Figure 2—source data 1. [file elife-92940-fig2-data1.xlsx]

## Sheet: Fig.2
Panel 2B
Classification of the injury severity
[x: spared tissue (%); y: ladder score (%) - week1]
	Ipsilateral transmission
Rat no.	x	y
1	55.5653	12.766
2	43.6147	0
3	45.7637	0
4	30.5935	1.72414
5	49.9711	2.5641
6	51.7194	7.01754
7	37.2188	0
8	40.219	34
9	65.92	32.6923
10	58.2317	0
11	51.9083	5.55556
12	57.076	2.04082
13	59.5471	18.8679
14	56.3166	12.5
15	57.2943	24
16	51.7212	0
