# Supplementary material for: Cortical neuroprosthesis-mediated functional ipsilateral control of locomotion in rats with spinal cord hemisection
Source: eLife. 2024 Nov 25;12:RP92940. doi: 10.7554/eLife.92940 (PMC11588340; doi:10.7554/eLife.92940)
Supplement: Figure 3—figure supplement 2—source data 1. [file elife-92940-fig3-figsupp2-data1.xlsx]

## Sheet: Fig.S2
Panel B
Gait modulation depends on stimulation delivery timing
Intact rats						After injury
	Step height (cm) - Right hindlimb [SP:spontaneous, RL: right lift]
Rat no.	SP	RL +/- 75ms	All other timings		Rat no.	SP	RL +/- 75ms	All other timings
1	0.965556	2.00056	2.51146		1	1.1163	1.30619	2.3069
2	0.913704	1.5403	2.04115		2	1.11963	1.25473	2.40476
3	0.953951	1.96375	2.17278		3	1.4542	2.72004	3.2639
4	1.90889	2.38492	2.8608		4	2.85074	2.97998	3.32736
5	0.942963	1.46684	2.18117		5	1.08815	1.2917	2.50177
6	0.984333	1.7111	2.18346		6	1.43148	1.755	2.41392
	Swing asymmetry (aU) - Left versus right hindlimb [SP:spontaneous, RL: right lift]
Rat no.	SP	t1	t2		Rat no.	SP	t1	t2
1	-0.148147	-0.130249	-0.246883		1	0.180452	-0.0134325	-0.100123
2	0.0178446	-0.274051	-0.293513		2	0.22351	0.0972244	-0.0242673
3	0.0649434	-0.135088	-0.249295		3	0.225574	0.0830725	-0.0719982
4	-0.132809	-0.164162	-0.146277		4	0.286816	0.253157	0.100447
5	-0.0216623	-0.168601	-0.228532		5	0.180361	0.141542	0.0508187
6	-0.0570559	-0.112879	-0.13729		6	0.3533	0.357202	0.188229
					7	0.166013	0.121908	0.00321304
	Stance asymmetry (aU) - Left versus right hindlimb[SP:spontaneous, RL: right lift]
Rat no.	SP	t1	t2		Rat no.	SP	t1	t2
1	0.0534672	0.0468519	0.0996148		1	-0.068518	0.025899	0.0497801
2	0.0181523	0.0965833	0.119686		2	-0.0663939	-0.0743973	-0.0329601
3	-0.0193507	0.0268546	0.0983815		3	-0.121993	-0.0387052	0.0372667
4	0.0405873	0.0428702	0.0583956		4	-0.171564	-0.171157	-0.0366416
5	0.000784545	0.0686171	0.13584		5	-0.0658904	-0.0795001	-0.0207912
6	0.0208867	0.0588531	0.0582517		6	-0.249026	-0.227984	-0.0979888
					7	-0.0957582	-0.0599409	-0.000567246
