# Supplementary material for: Cortical neuroprosthesis-mediated functional ipsilateral control of locomotion in rats with spinal cord hemisection
Source: eLife. 2024 Nov 25;12:RP92940. doi: 10.7554/eLife.92940 (PMC11588340; doi:10.7554/eLife.92940)
Supplement: Figure 3—figure supplement 3—source data 1. [file elife-92940-fig3-figsupp3-data1.xlsx]

## Sheet: Fig.S3
Panel A						Panel B						Panel C
Left hindlimb extension
	Max Iliac crest displacement (cm)						Swing asymmetry (aU) - Left versus right hindlimb						Stance asymmetry (aU) - Left versus right hindlimb
	1 week		4 weeks				1 week		4 weeks				1 week		4 weeks
Rat no.	Stim. OFF	Max	Stim. OFF	Max		Rat no.	Stim. OFF	Max	Stim. OFF	Max		Rat no.	Stim. OFF	Max	Stim. OFF	Max
1	0.74	1.176	0.219	0.725455		1	-0.139674	-0.515782	-0.138999	-0.205469		1	-0.0539539	0.399311	0.237762	0.431015
2	0.333	0.744167	0.137273	0.297778		2	-0.0518926	-0.583294	-0.127156	-0.46754		2	-0.342922	0.830662	-0.117394	1.09395
3	0.509	0.702857	0.033	0.144		3	0.472394	0.206032	0.330708	-0.27434		3	-0.517673	-0.454312	-0.102087	0.198206
4	0.415	0.513333	0.821	1.4025		4	0.543847	-0.289075	0.182751	-0.273566		4	-0.468237	0.335891	-0.194282	0.239726
5	0.125455	0.379	0.033	0.144		5	1.60815	-0.124539	0.253193	-0.522573		5	-0.341516	0.0681194	0.00246489	1.03639
Panel D										Panel E
Functional range of stimulation										Average impedance recorded over 6 weeks post implantation
Minimum:	Stimulation current intensity (uA)				Maximum:	Stimulation current intensity (uA)
										Rat no.	1 week	2 weeks	3 weeks	4 weeks	5 weeks	6 weeks
Rat no.	Intact	1 week	4 weeks		Rat no.	Intact	1 week	4 weeks		1	73.9688	128	133.903	128.269	86.5909	128.636
1	50	50	25		1	200	100	75		2	106.962	128.667	168.778	104.412	155	115.333
2	100	50	25		2	250	200	75		3	42.1	74.2903	51.129	83.35	105.333	98.5882
3	50	50	25		3	150	110	100		4	114.097	103.355	109.222	107.667	98.8	111.833
4	50	25	20		4	300	120	40		5	108.633	81.5484	57.1333	77.7407	70.3478	91.6071
5	40	30	20		5	140	90	70
