# Supplementary material for: Cortical neuroprosthesis-mediated functional ipsilateral control of locomotion in rats with spinal cord hemisection
Source: eLife. 2024 Nov 25;12:RP92940. doi: 10.7554/eLife.92940 (PMC11588340; doi:10.7554/eLife.92940)
Supplement: Figure 3—source data 1. [file elife-92940-fig3-data1.xlsx]

## Sheet: Fig.3
Panel 3D
Gait modulation depends on stimulation delivery timing
	Step height (cm) - Right hindlimb [IN:intact, SP:spontaneous, t# stimulation timing]
Rat no.	IN	SP	t1	t2	t3	t4 (LC)	t5	t6	t7	t8	t9 (RC)	t10
1	0.965556	1.1163	1.03704	1.54625	1.6637	2.05049	2.9019	2.52333	1.75185	1.11381	1.33926	1.13708
2	0.913704	1.11963	1.28753	1.12259	1.32089	2.75691	2.94185	2.07583	1.84444	1.57583	1.16708	1.05444
3	0.953951	1.4542	2.79714	2.31519	2.885	2.79825	3.38403	3.4	3.47333	3.09905	3.15593	2.06796
4	1.90889	2.85074	2.34431	2.6846	2.83111	2.50914	3.38413	3.48	3.93619	3.75944	3.15175	3.10864
5	0.942963	1.08815	1.42852	1.21792	1.66222	2.4563	2.44296	2.85708	2.25074	1.30583	1.22432	0.911389
6	0.984333	1.43148	1.39583	1.72937	1.98691	2.23037	2.63569	2.66259	2.12704	1.94417	1.53333	1.94037
	Swing asymmetry (aU) - Left versus right hindlimb [IN:intact, SP:spontaneous, t# stimulation timing]
Rat no.	IN	SP	t1	t2	t3	t4 (LC)	t5	t6	t7	t8	t9 (RC)	t10
1	0.0442782	0.180452	0.149247	0.0914118	-0.133365	-0.103993	-0.12559	-0.0874131	-0.083497	-0.150654	-0.08633	0.0490959
2	0.0649434	0.22351	0.235177	0.161134	-0.0507392	0.0760683	-0.126071	-0.16328	0.116213	-0.17094	0.101438	0.307277
3	-0.0635268	0.225574	0.232114	0.0825193	0.126488	-0.145443	0.0152203	-0.0539571	-0.103813	-0.0128474	-0.0242891	0.0944504
4	-0.0216623	0.286816	0.222438	0.350893	0.285862	0.175555	0.219468	0.0174745	-0.0107092	0.120106	0.416006	0.123635
5	-0.0570559	0.180361	0.142329	0.26764	0.0907776	0.100601	0.0687226	0.0371651	-0.00321399	0.0529833	0.129981	0.165541
6	-0.0321993	0.3533	0.34811	0.327886	0.322578	0.205472	0.169297	0.176986	0.201161	0.30402	0.381941	0.458679
7	-0.034251	0.166013	0.173668	0.0968697	0.0434594	-0.061887	-0.00638287	0.114558	-0.0334362	0.0853743	0.0938933	0.23818
	Stance asymmetry (aU) - Left versus right hindlimb [IN:intact, SP:spontaneous, t# stimulation timing]
Rat no.	IN	SP	t1	t2	t3	t4 (LC)	t5	t6	t7	t8	t9 (RC)	t10
1	-0.0110866	-0.068518	-0.0496131	0.021247	0.0490346	0.0398241	0.0556461	0.0395437	0.0641065	0.0632481	0.077467	-0.00598947
2	-0.0193507	-0.0663939	-0.122288	-0.126554	-0.0111477	-0.168853	0.0640367	0.0729368	-0.0999609	0.0549369	-0.120608	-0.120723
3	0.0261535	-0.121993	-0.137144	-0.0350415	-0.0595161	0.105668	-0.0266987	0.0117567	0.0583406	0.023527	0.0218265	-0.0458824
4	0.000784545	-0.171564	-0.194266	-0.243205	-0.234124	-0.0989591	-0.0663989	0.0156711	0.0031205	-0.0942102	-0.132085	-0.129053
5	0.0208867	-0.0658904	-0.0569906	-0.177382	-0.0383556	-0.0450209	-0.0320169	0.00277092	-0.00889781	0.00541912	-0.0644842	-0.145208
6	0.019003	-0.249026	-0.240946	-0.136626	-0.228011	-0.129002	-0.0842104	-0.0995067	-0.0792356	-0.191109	-0.271384	-0.299826
7	0.0225971	-0.0957582	-0.0442211	-0.0519523	-0.0285344	0.0686998	-0.0279054	-0.089143	0.0460796	-0.0398383	-0.0639618	-0.131137
Panel 3E
Stimulation amplitude modulates right kinmatics and gait phases duration
	Left step height (cm)								Right step height (cm)							Right flexion velocity (cm/s)
Rat no.	Intact	0	0.25	0.5	0.75	1		Rat no.	Intact	0	0.25	0.5	0.75	1		Rat no.	IN	0	0.25	0.5	0.75	1
1	0.849667	0.973778	1.26611	1.01244	0.757222	0.687		1	1.03587	1.00467	1.12049	1.57877	3.45383	4.12222		1	15.9965	19.9477	22.1623	31.4091	51.4173	56.1004
2	0.913704	1.11963	1.1137	1.48444	1.61815	1.35296		2	0.95619	1.00767	1.1137	1.43333	2.81815	2.94185		2	23.5006	19.3767	21.1962	27.2435	38.2634	42.852
3	1.20578	1.37867	1.47444	0.97	1.35741	1.63083		3	1.00926	1.30878	2.9363	2.94086	3.25247	3.73716		3	19.9606	16.9716	46.3823	41.4973	50.2925	49.3955
4	1.32233	0.899333	0.920556	0.453086	0.752	0.751481		4	1.448	1.96302	2.87259	2.89333	3.14025	3.00741		4	28.5136	28.7258	36.3241	38.1908	42.1772	40.6054
5	1.21148	0.989444	1.36667	1.72056	1.54616	1.69478		5	1.01185	0.979333	1.78778	2.26716	2.17875	2.97667		5	24.2571	22.3967	22.9595	25.6109	28.0384	33.8527
6	0.984333	0.529778	0.548667	0.746556	0.848667	0.585185		6	1.04429	1.28833	2.08864	1.98778	2.57877	2.78792		6	19.0688	14.9901	25.2193	29.2855	32.0024	33.525
7	1.35622	0.717778	0.654333	0.568444	0.642593	0.859259		7	1.33067	1.14878	1.34197	2.18122	2.75917	2.77286		7	29.4062	13.7956	15.8801	23.5907	25.4811	26.6398
	Swing asymmetry (aU) - Left versus right hindlimb								Stance asymmetry (aU) - Left versus right hindlimb
Rat no.	Intact	0	0.25	0.5	0.75	1		Rat no.	Intact	0	0.25	0.5	0.75	1
1	-0.0329809	0.362802	0.308167	0.203358	-0.0669389	-0.0818049		1	0.0308329	-0.168292	-0.164555	-0.115209	0.0153495	0.0400755
2	-0.0070428	0.484176	0.368894	0.325695	-0.00697548	-0.222375		2	0.00999474	-0.253716	-0.196394	-0.179637	0.00373115	0.129788
3	-0.0216623	0.300361	0.147964	0.0743879	0.0671703	0.101975		3	0.000784545	-0.171991	-0.116688	-0.0428997	-0.0610564	-0.0579762
4	-0.0550886	0.207664	0.115957	0.101176	-0.0984485	-0.0929191		4	0.0256225	-0.107403	-0.0587056	-0.0413725	0.0282146	0.0386157
5	-0.034251	0.166013	0.147202	-0.0435423	-0.146744	-0.148772		5	0.0225971	-0.0957582	-0.0714466	0.0184279	0.0787631	0.103005
6	-0.0321993	0.3533	0.165668	0.169297	0.0625868	0.171429		6	0.019003	-0.249026	-0.103259	-0.0842104	-0.019182	-0.0801574
7	-0.0731624	0.179445	0.15036	0.0290723	0.00244758	0.00268284		7	0.0405873	-0.0744414	-0.0580467	-0.0290051	0.0112004	0.0331423
