# Supplementary material for: Cortical neuroprosthesis-mediated functional ipsilateral control of locomotion in rats with spinal cord hemisection
Source: eLife. 2024 Nov 25;12:RP92940. doi: 10.7554/eLife.92940 (PMC11588340; doi:10.7554/eLife.92940)
Supplement: Figure 4—source data 1. [file elife-92940-fig4-data1.xlsx]

## Sheet: Fig.4
Panel 4B
Left extensor activation
	Burst duration (aU) - [IN: intact]
Rat no.	IN	0	0.25	0.5	0.75	1
1	1.11842	0.460526	0.690789	0.888158	0.888158	1.01974
2	0.921053	0.197368	0.197368	0.690789	0.592105	1.31579
3	0.921053	0.230263	0.296053	0.526316	0.559211	0.756579
4	0.921053	0.164474	0.427632	0.690789	0.723684	0.822368
5	1.11842	0.394737	0.690789	0.723684	0.756579	0.723684
	Total activation (aU) - [IN: intact]
Rat no.	IN	0	0.25	0.5	0.75	1
1	1.26473	0.135936	0.51479	0.838344	1.05526	1.24926
2	0.94988	0.0403227	0.0490346	0.368289	0.449103	0.674365
3	0.860976	0.0717706	0.137739	0.22372	0.294762	0.510841
4	1.1045	0.0344772	0.105831	0.285804	0.36612	0.349216
5	0.819914	0.103877	0.32565	0.298661	0.365213	0.299402
