# Supplementary material for: Cortical neuroprosthesis-mediated functional ipsilateral control of locomotion in rats with spinal cord hemisection
Source: eLife. 2024 Nov 25;12:RP92940. doi: 10.7554/eLife.92940 (PMC11588340; doi:10.7554/eLife.92940)
Supplement: Figure 6—figure supplement 1—source data 1. [file elife-92940-fig6-figsupp1-data1.xlsx]

## Sheet: Fig.S4
Panel A
Correlation between motor maps and recovery of fine motor control (ladder task)
[x: cortico-motor trasmission (% responding channels)3 weeks after injury; y: ladder performance (%)]
	Ipsilateral transmission
Rat no.	x	y		[x: distal cortico-motor trasmission (% distal channels over all responding channels) 3 weeks after injury; y: ladder performance (%)]
1	0.65625	0.298246			Distal ipsilateral transmission
2	0.84375	0.12963		Rat no.	x	y
3	0.25	0.254545		1	0.125	0.298246
4	0.5	0.235294		2	0	0.12963
5	0.65625	0.348837		3	0	0.254545
6	0.5625	0.381818		4	0	0.235294
7	0.96875	0.258621		5	0	0.348837
8	0.4375	0.5		6	0.09375	0.381818
9	0.625	0.176471		7	0.1875	0.258621
10	0.40625	0.265625		8	0.28125	0.5
11	0.125	0.333333		9	0	0.176471
12	0.28125	0.242424		10	0	0.265625
				11	0	0.333333
				12	0	0.242424
Panel B
Same, week 4 after injury
	Ipsilateral transmission				Distal ipsilateral transmission
Rat no.	x	y		Rat no.	x	y
1	0.71875	0.28125		1	0.190476	0.28125
2	0.6875	0.196429		2	0	0.196429
3	0.25	0.313725		3	0	0.313725
4	0.46875	0.338983		4	0	0.338983
5	0.65625	0.297872		5	0	0.297872
6	0.5625	0.309091		6	0.166667	0.309091
7	0.96875	0.232143		7	0.193548	0.232143
8	0.46875	0.516129		8	0.642857	0.516129
9	0.71875	0.204082		9	0	0.204082
10	0.5625	0.355932		10	0	0.355932
11	0.125	0.346939		11	0	0.346939
12	0.28125	0.295775		12	0	0.295775
