# Supplementary material for: Cortical neuroprosthesis-mediated functional ipsilateral control of locomotion in rats with spinal cord hemisection
Source: eLife. 2024 Nov 25;12:RP92940. doi: 10.7554/eLife.92940 (PMC11588340; doi:10.7554/eLife.92940)
Supplement: Figure 6—source data 1. [file elife-92940-fig6-data1.xlsx]

## Sheet: Fig.6
Panel 6A
Ipsilesional cortical motor maps - hindlimbs representation (n=12)
Occurrence probability (% of rats)
Contralateral transmission: proximal response
Intact				post injury:		Day 5					Day 7					Day 9					Day 14					Day 21					Day 28					day 42					Day 56
75	58.3333	33.3333	58.3333			25	33.3333	16.6667	25		41.6667	58.3333	41.6667	58.3333		66.6667	58.3333	58.3333	58.3333		75	75	66.6667	66.6667		75	83.3333	66.6667	75		66.6667	83.3333	66.6667	75		83.3333	75	75	75		75	75	75	75
75	75	25	50			25	33.3333	8.33333	25		33.3333	66.6667	33.3333	66.6667		66.6667	83.3333	41.6667	58.3333		66.6667	91.6667	58.3333	66.6667		75	91.6667	58.3333	75		58.3333	91.6667	58.3333	75		66.6667	83.3333	66.6667	75		66.6667	83.3333	66.6667	75
58.3333	66.6667	33.3333	50			33.3333	25	0	25		25	50	41.6667	58.3333		58.3333	50	41.6667	58.3333		58.3333	58.3333	50	66.6667		66.6667	58.3333	50	66.6667		50	66.6667	50	66.6667		58.3333	58.3333	58.3333	66.6667		66.6667	58.3333	58.3333	66.6667
58.3333	75	33.3333	41.6667			25	16.6667	8.33333	16.6667		33.3333	50	33.3333	50		58.3333	66.6667	41.6667	66.6667		58.3333	66.6667	50	75		66.6667	66.6667	58.3333	66.6667		66.6667	66.6667	58.3333	66.6667		66.6667	66.6667	58.3333	58.3333		66.6667	66.6667	58.3333	75
66.6667	41.6667	41.6667	25			16.6667	0	16.6667	8.33333		41.6667	25	25	25		75	66.6667	50	25		83.3333	66.6667	66.6667	25		83.3333	75	75	33.3333		75	75	75	33.3333		66.6667	58.3333	66.6667	33.3333		75	58.3333	66.6667	33.3333
50	58.3333	25	33.3333			25	0	0	0		33.3333	8.33333	25	33.3333		50	41.6667	41.6667	41.6667		66.6667	50	66.6667	41.6667		58.3333	66.6667	75	58.3333		58.3333	75	75	58.3333		58.3333	66.6667	66.6667	50		58.3333	66.6667	66.6667	50
58.3333	50	25	25			8.33333	8.33333	8.33333	0		8.33333	16.6667	16.6667	16.6667		41.6667	41.6667	50	33.3333		50	66.6667	58.3333	33.3333		50	66.6667	58.3333	41.6667		41.6667	75	66.6667	41.6667		50	58.3333	50	41.6667		58.3333	58.3333	58.3333	33.3333
50	41.6667	33.3333	25			8.33333	16.6667	8.33333	0		8.33333	25	8.33333	25		16.6667	50	50	25		16.6667	66.6667	75	41.6667		25	66.6667	75	50		16.6667	66.6667	83.3333	58.3333		25	41.6667	66.6667	33.3333		25	41.6667	75	41.6667
Contralateral transmission: distal response
Intact				post injury:		Day 5					Day 7					Day 9					Day 14					Day 21					Day 28					day 42					Day 56
50	41.6667	25	41.6667			16.6667	25	0	16.6667		25	33.3333	8.33333	41.6667		41.6667	33.3333	8.33333	41.6667		58.3333	33.3333	25	25		58.3333	41.6667	25	41.6667		58.3333	50	25	33.3333		50	41.6667	33.3333	41.6667		50	41.6667	33.3333	50
25	41.6667	8.33333	33.3333			16.6667	25	0	16.6667		25	41.6667	8.33333	25		41.6667	50	0	33.3333		41.6667	58.3333	16.6667	33.3333		50	50	16.6667	41.6667		50	66.6667	8.33333	33.3333		41.6667	50	16.6667	33.3333		41.6667	50	16.6667	33.3333
16.6667	33.3333	8.33333	33.3333			25	16.6667	0	16.6667		16.6667	25	8.33333	16.6667		25	25	8.33333	33.3333		33.3333	33.3333	8.33333	25		50	25	8.33333	41.6667		50	25	8.33333	25		33.3333	25	16.6667	33.3333		41.6667	25	16.6667	33.3333
16.6667	41.6667	25	16.6667			16.6667	16.6667	0	16.6667		25	25	8.33333	33.3333		25	25	16.6667	33.3333		25	33.3333	16.6667	33.3333		25	25	16.6667	41.6667		25	16.6667	16.6667	33.3333		33.3333	16.6667	25	50		33.3333	25	25	50
25	0	8.33333	16.6667			8.33333	0	16.6667	0		8.33333	0	16.6667	8.33333		16.6667	0	16.6667	8.33333		25	16.6667	33.3333	8.33333		33.3333	16.6667	25	25		41.6667	25	25	25		33.3333	16.6667	25	25		33.3333	16.6667	25	25
16.6667	8.33333	8.33333	16.6667			0	0	0	0		8.33333	0	8.33333	8.33333		8.33333	8.33333	16.6667	16.6667		8.33333	8.33333	25	16.6667		16.6667	16.6667	16.6667	25		8.33333	16.6667	16.6667	25		8.33333	25	16.6667	25		8.33333	25	16.6667	33.3333
16.6667	16.6667	0	0			0	0	0	0		0	0	0	0		8.33333	16.6667	8.33333	0		8.33333	16.6667	8.33333	0		8.33333	16.6667	8.33333	8.33333		0	25	0	8.33333		0	16.6667	0	8.33333		0	16.6667	0	8.33333
8.33333	8.33333	8.33333	0			0	8.33333	0	0		0	8.33333	8.33333	0		0	8.33333	16.6667	0		0	8.33333	16.6667	8.33333		0	25	16.6667	8.33333		0	25	8.33333	8.33333		0	16.6667	8.33333	8.33333		0	16.6667	8.33333	8.33333
Contralateral transmission: proximal response
Intact				post injury:		Day 5					Day 7					Day 9					Day 14					Day 21					Day 28					day 42					Day 56
16.6667	41.6667	25	41.6667			8.33333	0	0	0		8.33333	33.3333	25	41.6667		16.6667	41.6667	41.6667	41.6667		50	58.3333	58.3333	58.3333		58.3333	58.3333	58.3333	58.3333		50	75	58.3333	66.6667		50	75	66.6667	66.6667		41.6667	66.6667	66.6667	66.6667
16.6667	33.3333	16.6667	33.3333			0	0	0	0		8.33333	41.6667	25	41.6667		8.33333	58.3333	25	41.6667		41.6667	66.6667	58.3333	58.3333		58.3333	66.6667	58.3333	66.6667		50	66.6667	58.3333	66.6667		41.6667	58.3333	58.3333	50		41.6667	50	58.3333	58.3333
0	25	16.6667	41.6667			8.33333	8.33333	0	0		8.33333	25	16.6667	50		8.33333	33.3333	8.33333	50		16.6667	58.3333	41.6667	66.6667		33.3333	58.3333	41.6667	66.6667		25	66.6667	50	66.6667		33.3333	66.6667	50	58.3333		33.3333	58.3333	58.3333	58.3333
8.33333	16.6667	16.6667	33.3333			8.33333	8.33333	0	0		8.33333	33.3333	8.33333	8.33333		8.33333	41.6667	16.6667	33.3333		16.6667	50	41.6667	33.3333		33.3333	66.6667	41.6667	41.6667		25	66.6667	41.6667	58.3333		25	66.6667	41.6667	41.6667		33.3333	58.3333	41.6667	41.6667
0	8.33333	16.6667	25			0	0	0	0		0	16.6667	16.6667	16.6667		8.33333	16.6667	25	25		41.6667	41.6667	33.3333	33.3333		50	41.6667	33.3333	33.3333		50	50	41.6667	33.3333		33.3333	41.6667	25	33.3333		33.3333	41.6667	25	33.3333
8.33333	16.6667	8.33333	25			0	0	0	0		0	8.33333	16.6667	33.3333		0	8.33333	16.6667	41.6667		8.33333	16.6667	33.3333	41.6667		41.6667	25	41.6667	41.6667		50	33.3333	41.6667	50		25	41.6667	25	41.6667		33.3333	41.6667	25	41.6667
8.33333	16.6667	8.33333	16.6667			0	0	0	0		0	8.33333	8.33333	16.6667		0	8.33333	16.6667	16.6667		8.33333	25	33.3333	25		8.33333	41.6667	50	33.3333		8.33333	41.6667	50	33.3333		8.33333	50	33.3333	25		16.6667	50	41.6667	25
8.33333	16.6667	16.6667	16.6667			0	0	0	0		0	8.33333	0	8.33333		0	8.33333	16.6667	8.33333		8.33333	25	33.3333	33.3333		16.6667	50	41.6667	41.6667		16.6667	41.6667	41.6667	41.6667		16.6667	25	25	25		16.6667	33.3333	25	33.3333
Ipsilateral transmission: distal response
Intact				post injury:		Day 5					Day 7					Day 9					Day 14					Day 21					Day 28					day 42					Day 56
0	0	0	0			0	0	0	0		0	0	0	0		0	0	0	0	0	0	16.6667	8.33333	8.33333		0	16.6667	8.33333	25		0	8.33333	8.33333	25		0	8.33333	25	16.6667		0	8.33333	25	16.6667
0	8.33333	8.33333	0			0	0	0	0		0	0	0	0		0	0	0	0	0	0	8.33333	0	25		0	8.33333	0	25		0	0	0	16.6667		0	8.33333	8.33333	25		0	8.33333	8.33333	25
0	0	0	0			0	0	0	0		0	0	0	0		0	0	0	0	0	0	0	0	16.6667		0	0	0	33.3333		0	8.33333	0	25		0	0	0	25		0	8.33333	8.33333	25
0	0	0	0			0	0	0	0		0	0	0	0		0	0	0	0	0	0	0	0	8.33333		0	0	8.33333	16.6667		0	0	8.33333	25		0	0	16.6667	25		0	0	16.6667	25
0	0	8.33333	0			0	0	0	0		0	0	0	0		0	0	0	0	0	0	0	0	8.33333		0	0	0	8.33333		0	0	0	8.33333		0	0	0	8.33333		0	0	0	8.33333
0	0	8.33333	0			0	0	0	0		0	0	0	8.33333		0	0	0	8.33333	0	0	0	0	8.33333		0	0	0	8.33333		0	0	0	8.33333		0	0	0	8.33333		0	0	0	8.33333
0	0	0	0			0	0	0	0		0	0	0	8.33333		0	0	0	8.33333	0	0	0	0	8.33333		0	0	0	8.33333		0	0	0	8.33333		0	0	0	8.33333		0	0	0	8.33333
0	0	0	0			0	0	0	0		0	0	0	8.33333		0	0	0	8.33333	0	0	0	0	8.33333		0	0	0	8.33333		0	0	0	8.33333		0	0	0	8.33333		0	0	0	8.33333
Panel 6B
Contralateral and ipsilateral transmission
	Responding channels (%) - Contralateral
Rat no.	Day 0	Day 5	Day 7	Day 9	Day 14	Day 21	Day 28	Day 42	Day 56
1	0.53125	0.34375	0.6875	0.84375	0.90625	0.875	0.8125	0.375	0.53125		17
2	0.8125	0.0625	0.1875	0.3125	0.84375	0.9375	0.8125	0.8125	0.84375		27
3	0.375	0.3125	0.34375	0.34375	0.34375	0.34375	0.40625	0.40625	0.40625		13
4	0.96875	0.09375	0.4375	0.625	0.53125	0.5625	0.5625	0.5	0.5		16
5	0.75	0	0.40625	0.75	0.84375	0.90625	0.90625	0.84375	0.84375		27
6	0.46875	0.40625	0.5	0.71875	0.71875	0.71875	0.71875	0.875	0.875		28
7	0.75	0.21875	0.5625	0.96875	0.96875	0.96875	1	0.90625	0.90625		29
8	0.5625	0.3125	0.53125	0.53125	0.53125	0.53125	0.5	0.4375	0.4375		14
9	0.4375	0.25	0.5625	0.625	0.75	0.75	0.75	0.75	0.75		24
10	0.4375	0	0.5625	0.59375	0.75	0.78125	0.78125	0.78125	0.78125		25
11	0.34375	0.21875	0.3125	0.3125	0.40625	0.40625	0.4375	0.40625	0.375		12
12	0.53125	0.09375	0.3125	0.84375	0.84375	0.84375	0.84375	0.84375	0.84375		27
	Responding channels (%) - Ipsilateral
Rat no.	Day 0	Day 5	Day 7	Day 9	Day 14	Day 21	Day 28	Day 42	Day 56
1	0.09375	0	0.1875	0.21875	0.53125	0.65625	0.71875	0.3125	0.375		12
2	0.5	0	0.1875	0.1875	0.8125	0.84375	0.6875	0.75	0.8125		26
3	0.1875	0.15625	0.25	0.25	0.25	0.25	0.25	0.25	0.21875		7
4	0.46875	0	0.40625	0.5	0.46875	0.5	0.46875	0.46875	0.46875		15
5	0.34375	0	0.09375	0.25	0.5625	0.65625	0.65625	0.625	0.625		20
6	0.15625	0	0.1875	0.46875	0.4375	0.5625	0.5625	0.65625	0.6875		22
7	0.1875	0	0.5	0.5625	0.9375	0.96875	0.96875	0.90625	0.90625		29
8	0.3125	0.125	0.34375	0.375	0.4375	0.4375	0.46875	0.4375	0.34375		11
9	0.28125	0	0.09375	0.3125	0.46875	0.625	0.71875	0.71875	0.71875		23
10	0	0	0.09375	0.09375	0.25	0.40625	0.5625	0.5625	0.5625		18
11	0.09375	0	0.125	0.125	0.125	0.125	0.125	0.0625	0.0625		2
12	0.1875	0	0.15625	0.25	0.28125	0.28125	0.28125	0.28125	0.28125		9
Panel 6D
Locomotor score (aU)
Rat no.	Day 0	Day 5	Day 7	Day 9	Day 14	Day 21	Day 28
1	20	4	7	10	14	16	17
2	20	0	0	1	11	14	15
3	20	1	6	8	11	13	14
4	20	2	6	12	13	14	15
5	20	1	13	14	17	18	19
6	20	5	11	13	15	16	17
7	20	1	5	12	14	16	17
8	20	8	10	13	16	17	18
9	20	0	4	9	14	16	17
10	20	1	4	9	12	16	17
11	20	11	14	15	16	17	17
12	20	0	1	11	13	15	16
Panel 6F
Decrease in transmission does not depend on lesion size
[x: change in trasmission (% intact map size) 5 days after injury; y: spared tissue (%)]
	Ipsilateral transmission				Contralateral transmission
Rat no.	x	y		Rat no.	x	y
1	0.555653	-100		1	0.555653	-35.2941
2	0.436147	-100		2	0.436147	-92.3077
3	0.457637	-16.6667		3	0.457637	-16.6667
4	0.305935	-100		4	0.305935	-90.3226
5	0.499711	-100		5	0.499711	-100
6	0.40219	-100		6	0.40219	-13.3333
7	0.57076	-100		7	0.57076	-70.8333
8	0.6592	-60		8	0.6592	-44.4444
9	0.582317	-100		9	0.582317	-42.8571
10	0.563166	-100		10	0.563166	-100
11	0.572943	-100		11	0.572943	-36.3636
12	0.517212	-100		12	0.517212	-82.3529
Panel 6G
Motor maps do not correlate with locomotor deficits or recovery
[x: locomotor score (aU) - W1; y: responding channels (%) - W1]
	Ipsilateral transmission				Contralateral transmission
Rat no.	x	y		Rat no.	x	y
1	7	18.75		1	7	68.75
2	0	18.75		2	0	18.75
3	6	25		3	6	34.375
4	6	40.625		4	6	43.75
5	13	9.375		5	13	40.625
6	11	18.75		6	11	50
7	5	50		7	5	56.25
8	10	34.375		8	10	53.125
9	4	9.375		9	4	56.25
10	4	9.375		10	4	56.25
11	14	12.5		11	14	31.25
12	1	15.625		12	1	31.25
[x: locomotor score (aU) - W4; y: responding channels (%) - W1]
	Ipsilateral transmission				Contralateral transmission
Rat no.	x	y		Rat no.	x	y
1	17	18.75		1	17	68.75
2	15	18.75		2	15	18.75
3	14	25		3	14	34.375
4	15	40.625		4	15	43.75
5	19	9.375		5	19	40.625
6	17	18.75		6	17	50
7	17	50		7	17	56.25
8	18	34.375		8	18	53.125
9	17	9.375		9	17	56.25
10	17	9.375		10	17	56.25
11	17	12.5		11	17	31.25
12	16	15.625		12	16	31.25
[x: locomotor score (aU) - W4; y: responding channels (%) - W4]
	Ipsilateral transmission				Contralateral transmission
Rat no.	x	y		Rat no.	x	y
1	17	71.875		1	17	81.25
2	15	68.75		2	15	81.25
3	14	25		3	14	40.625
4	15	46.875		4	15	56.25
5	19	65.625		5	19	90.625
6	17	56.25		6	17	71.875
7	17	96.875		7	17	100
8	18	46.875		8	18	50
9	17	71.875		9	17	75
10	17	56.25		10	17	78.125
11	17	12.5		11	17	43.75
12	16	28.125		12	16	84.375
