# Supplementary material for: Cortical neuroprosthesis-mediated functional ipsilateral control of locomotion in rats with spinal cord hemisection
Source: eLife. 2024 Nov 25;12:RP92940. doi: 10.7554/eLife.92940 (PMC11588340; doi:10.7554/eLife.92940)
Supplement: Figure 7—source data 1. [file elife-92940-fig7-data1.xlsx]

## Sheet: Fig.7
Panel 7D
Evoked EMG map: ipsilateral dominance
	Map rat #1 - % contralateral response						Map rat #2 - % contralateral response
	Column1	Column2	Column3	Column4			Column1	Column2	Column3	Column4
Row1	33.8961	21.887	26.369	42.9711		Row1	x	27.9287	21.3869	23.3022
Row2	46.5171	28.6604	31.0014	327.122		Row2	x	25.1102	18.3208	79.3182
Row3	x	25.6828	73.123	275.7		Row3	x	13.0785	11.1576	168.186
Row4	x	28.7227	74.4745	211.33		Row4	x	7.60366	6.153	392.999
Row5	35.1026	23.1065	37.387	64.1989		Row5	x	x	17.1554	667.942
Row6	x	31.9846	38.526	56.83		Row6	12.7751	9.47755	x	692.111
Row7	x	29.8363	66.0563	89.4598		Row7	x	7.69775	x	518.728
Row8	x	27.8403	70.9628	34.9172		Row8	x	5.98885	9.21913	270.322
Panel 7E
Stimulation amplitude modulates left hindlimb kinematics
	Step height (cm)
Rat no.	Intact	0	0.25	0.5	0.75	1
1	0.984333	0.767	1.16576	1.40433	1.80689	1.72
2	1.20578	0.966667	1.18	1.22292	1.47619	1.77611
	Dragging (% left swing)
Rat no.	Intact	0	0.25	0.5	0.75	1
1	0.0187446	0.435342	0.277593	0.227718	0.243505	0.228026
2	0	0.113821	0.0938196	0.0136448	0	0
	Flexion velocity (cm/s)
Rat no.	Intact	0	0.25	0.5	0.75	1
1	19.0688	12.935	13.6841	15.7797	16.5559	16.6612
2	26.5548	16.1827	17.4382	28.0045	26.4347	31.2833
