# Supplementary material for: Cortical neuroprosthesis-mediated functional ipsilateral control of locomotion in rats with spinal cord hemisection
Source: eLife. 2024 Nov 25;12:RP92940. doi: 10.7554/eLife.92940 (PMC11588340; doi:10.7554/eLife.92940)
Supplement: Figure 8—source data 1. [file elife-92940-fig8-data1.xlsx]

## Sheet: Fig.8
Panel 8B
Ipsilateral hindlimb extension
	Max iliac crest difference (cm)						Max iliac crest difference (cm)						Max iliac crest difference (cm)
		Stimulation ON						Stimulation ON						Stimulation ON
rat #1	Stim OFF	Minimum	Medium	Maximum		rat #2	Stim OFF	Minimum	Medium	Maximum		rat #3	Stim OFF	Minimum	Medium	Maximum
Step 1	0.2	2	1.5	3.3		Step 1	2.2	1.8	2.9	3.6		Step 1	0.1	0.8	1.3	3.1
Step 2	0.5	2.6	1.2	0.8		Step 2	2.1	1.3	2	4.5		Step 2	1.4	2.6	3.9	2.3
Step 3	1	3.5	0.9	4.9		Step 3	0	3.2	2.7	3.3		Step 3	1.5	1.6	0.1	4
Step 4	4	1.1	0.4	3.1		Step 4	2.7	2.1	0.4	2.9		Step 4	0.2	1.9	4.5	0.9
Step 5	0.2	0.7	3.8	0.6		Step 5	1.8	4.2	4.1	3.4		Step 5	0.8	1.5	2.4	0.7
Step 6	0	2.1	2.9	4.3		Step 6	1.2	2.7	3.8	4.7		Step 6	1	3.3	1.9	2.8
Step 7	0	0	0	3.1		Step 7	1.9	3.1	4.6	3.1		Step 7	1.3	1.5	2.6	2.4
Step 8	1.6	4.7	2.1	2.5		Step 8	1.5	0.9	4.9	4.1		Step 8	1.1	2.3	1.6	2.6
Step 9	0.5	0.5	6.5	3.8		Step 9	3	2.4	3.5	4		Step 9	1.4	1.9	2.9	2.3
Step 10	3.1	1.7	0.9	2.8		Step 10	4.1	2.2	3.1	4.3		Step 10	1	2.3	1.7	3.2
		0.8								5
