# Supplementary material for: Cortical neuroprosthesis-mediated functional ipsilateral control of locomotion in rats with spinal cord hemisection
Source: eLife. 2024 Nov 25;12:RP92940. doi: 10.7554/eLife.92940 (PMC11588340; doi:10.7554/eLife.92940)
Supplement: Figure 9—source data 1. [file elife-92940-fig9-data1.xlsx]

## Sheet: Fig.9
Panel 9B
Evoked rhythms when applying long-train stimulation
	Sorted by		Evoked rhythms
	injury severity		Intact	Week 1	Week 2	Week 3
Rat1	Severe		Bilateral	No response	Contralateral	Bilateral
Rat2	Moderate 1		Bilateral	Contralateral	Bilateral	Bilateral
Rat3	Moderate 2		Bilateral	Contralateral	Bilateral	Bilateral
Rat4	Moderate 3		Bilateral	Bilateral	Bilateral	Bilateral
Rat5	Moderate 4		Bilateral	Bilateral	Bilateral	Bilateral
Rat6	Mild		Bilateral	Bilateral	Bilateral	Bilateral
Panel 9F
Evoked rhythms with and without ketamine sedation
	Evoked rhythms
	Pre	Post ketamine
Rat1	Bilateral 3x	Co-contraction
Rat2	Bilateral 2x	Co-contraction
Rat3	Bilateral 2x	Co-contraction
Rat4	Bilateral 2x	Contralateral response only
